# Supplementary material for: Ticks, Hair Loss, and Non-Clinging Babies: A Novel Tick-Based Hypothesis for the Evolutionary Divergence of Humans and Chimpanzees
Source: MDPI journal article supplement (doi:10.3390/life11050435), 2021-05-12
Supplement: s1 [file s1]

# Ticks, Hair Loss, and Non-Clinging Babies: A Novel Tick-Based Hypothesis for the Evolutionary Divergence of Humans and Chimpanzees

Jeffrey G. Brown

Supplementary file 1. Minimal night-time temperatures at multiple sites surrounding Lake Victoria (weatherspark.com)

| Site      | Country  | Elevation (m) | Minimum Night-time Temperature Average/Range (°C) |            |            |            |            |            |            |            |            |            |            |            | Annual Lowest Night-time Temp (°C) |
|-----------|----------|---------------|---------------------------------------------------|------------|------------|------------|------------|------------|------------|------------|------------|------------|------------|------------|------------------------------------|
|           |          |               | Jan                                               | Feb        | Mar        | April      | May        | Jun        | Jul        | Aug        | Sept       | Oct        | Nov        | Dec        |                                    |
| Mbarara   | Uganda   | 1420          | 15 (13–16)                                        | 15 (14–17) | 15 (14–17) | 15 (14–17) | 15 (14–17) | 15 (13–17) | 15 (13–16) | 15 (13–16) | 15 (13–16) | 15 (13–16) | 15 (14–16) | 15 (14–16) | 13                                 |
| Kampala   | Uganda   | 1192          | 18 (16–19)                                        | 18 (16–20) | 18 (17–20) | 19 (17–20) | 18 (17–20) | 18 (16–19) | 17 (16–18) | 17 (16–18) | 17 (16–18) | 17 (16–19) | 18 (16–19) | 18 (16–19) | 16                                 |
| Mbale     | Uganda   | 1130          | 18 (16–19)                                        | 18 (16–20) | 18 (17–20) | 18 (17–20) | 18 (16–19) | 17 (15–19) | 17 (15–18) | 17 (15–18) | 17 (15–19) | 17 (16–19) | 17 (15–19) | 17 (15–19) | 15                                 |
| Bungoma   | Kenya    | 1422          | 15 (13–17)                                        | 15 (14–17) | 16 (14–18) | 16 (15–17) | 16 (14–17) | 15 (13–16) | 15 (13–16) | 15 (13–16) | 15 (13–16) | 15 (14–17) | 15 (14–17) | 15 (14–17) | 13                                 |
| Kakamega  | Kenya    | 1526          | 15 (13–17)                                        | 15 (13–17) | 16 (14–17) | 16 (14–17) | 15 (14–17) | 15 (13–16) | 14 (13–16) | 14 (13–16) | 14 (13–16) | 15 (13–16) | 15 (14–16) | 15 (13–17) | 13                                 |
| Migori    | Kenya    | 1438          | 16 (14–17)                                        | 16 (14–17) | 16 (14–18) | 16 (14–17) | 15 (14–17) | 15 (13–16) | 15 (13–16) | 15 (13–16) | 15 (14–17) | 16 (14–17) | 16 (14–17) | 16 (14–17) | 13                                 |
| Musoma    | Tanzania | 1150          | 20 (18–21)                                        | 20 (18–21) | 20 (19–22) | 20 (18–21) | 19 (18–21) | 19 (17–20) | 18 (16–20) | 19 (17–20) | 19 (18–21) | 19 (18–21) | 19 (18–21) | 19 (18–21) | 16                                 |
| Mwanza    | Tanzania | 1181          | 19 (17–20)                                        | 19 (17–21) | 19 (18–21) | 19 (18–21) | 18 (16–20) | 17 (15–19) | 17 (15–19) | 18 (15–20) | 19 (16–20) | 19 (18–21) | 19 (18–21) | 19 (17–20) | 15                                 |
| Shinyanga | Tanzania | 1132          | 16 (14–18)                                        | 16 (14–18) | 17 (15–19) | 17 (15–19) | 16 (14–19) | 15 (13–18) | 15 (12–17) | 16 (13–18) | 17 (14–19) | 18 (15–20) | 18 (16–20) | 17 (15–19) | 12                                 |
| Ushirombo | Tanzania | 1197          | 16 (14–18)                                        | 16 (15–18) | 17 (15–19) | 17 (16–19) | 17 (14–19) | 15 (12–18) | 15 (12–17) | 16 (13–18) | 17 (14–19) | 17 (15–19) | 17 (15–19) | 16 (15–18) | 12                                 |
| Bukoba    | Tanzania | 1197          | 18 (16–20)                                        | 18 (17–20) | 19 (17–21) | 19 (17–21) | 19 (17–20) | 18 (16–20) | 17 (16–19) | 18 (16–19) | 18 (16–19) | 18 (17–19) | 18 (17–20) | 18 (17–20) | 16                                 |
| Nsunga    | Tanzania | 1202          | 16 (14–17)                                        | 16 (14–18) | 16 (15–18) | 17 (15–18) | 16 (14–18) | 16 (14–18) | 15 (14–17) | 16 (14–17) | 16 (14–17) | 16 (14–17) | 16 (15–18) | 16 (14–17) | 14                                 |

**Supplementary file 2.** Grooming time (% daily activity) in arboreal versus terrestrial primates

| Species                        | Common Name                 | Grooming Time (% Daily Activity) | Average Grooming Time (% Daily Activity) |
|--------------------------------|-----------------------------|----------------------------------|------------------------------------------|
| <b>Arboreal</b>                |                             |                                  |                                          |
| <b>Orangutans†</b>             |                             |                                  |                                          |
| <i>Pongo pygmaeus</i>          | Bornean orangutan           | 0.01 <sup>1</sup>                | <b>Orangutans</b>                        |
| <i>Pongo abelii</i>            | Sumatran orangutan          | 0.01 <sup>1</sup>                |                                          |
|                                |                             | <b>0.02/2 =</b>                  | <b>0.01</b>                              |
| <b>New World Monkeys</b>       |                             |                                  |                                          |
| <i>Saguinus mystax</i>         | Moustached tamarin          | 1.85 <sup>1</sup>                | <b>New World Monkeys</b>                 |
| <i>Cebus olivaceus</i>         | Wedge-capped capuchin       | 1.9 <sup>1</sup>                 |                                          |
| <i>Cebus apella</i>            | Tufted capuchin             | 1.21 <sup>1</sup>                |                                          |
| <i>Cebus albifrons</i>         | White-fronted capuchin      | 0.615 <sup>1</sup>               |                                          |
| <i>Callicebus torquatus</i>    | Collared titi               | 9.9 <sup>1</sup>                 |                                          |
| <i>Callicebus oenanthe</i>     | Rio Mayo titi               | 4.5 <sup>1</sup>                 |                                          |
| <i>Chiropotes satanas</i>      | Black bearded saki          | 0.4 <sup>1</sup>                 |                                          |
| <i>Pithecia pithecia</i>       | White-faced saki            | 0.8 <sup>1</sup>                 |                                          |
| <i>Cacajao calvus</i>          | Bald uakari                 | 1.8 <sup>1</sup>                 |                                          |
| <i>Alouatta palliata</i>       | Mantled howler monkey       | 0 <sup>1</sup>                   |                                          |
| <i>Alouatta seniculus</i>      | Venezuelan red howler       | 0.4 <sup>1</sup>                 |                                          |
| <i>Alouatta guariba</i>        | Brown howler                | 2.6 <sup>1</sup>                 |                                          |
| <i>Alouatta caraya</i>         | Black howler                | 1.2 <sup>1</sup>                 |                                          |
| <i>Ateles geoffroyi</i>        | Black-handed spider monkey  | 2.5 <sup>1</sup>                 |                                          |
| <i>Ateles belzebuth</i>        | White-bellied spider monkey | 0.1 <sup>1</sup>                 |                                          |
| <i>Brachyteles hypoxanthus</i> | Northern miriqui            | 0 <sup>1</sup>                   |                                          |
|                                |                             | <b>29.8/16 =</b>                 | <b>1.9</b>                               |
| <b>Gibbons/Siamangs</b>        |                             |                                  |                                          |
| <i>Hylobates lar</i>           | Lar gibbon                  | 4.4 <sup>1</sup>                 |                                          |

|                                 |                 |                 |                              |
|---------------------------------|-----------------|-----------------|------------------------------|
| <i>Hylobates klossii</i>        | Kloss's gibbon  | 0 <sup>1</sup>  | <b>Gibbons/<br/>Siamangs</b> |
| <i>Hylobates agilis</i>         | Agile gibbon    | 0 <sup>1</sup>  |                              |
| <i>Hylobates pileatus</i>       | Pileated gibbon | 5 <sup>1</sup>  |                              |
| <i>Symphalangus syndactylus</i> | Siamang         | 10 <sup>1</sup> |                              |
|                                 |                 | <b>19.4/5 =</b> | <b>3.9</b>                   |

### Arboreal Old World Monkeys

|                                  |                               |                   |
|----------------------------------|-------------------------------|-------------------|
| <i>Presbytis siamensis</i>       | White-thighed surili          | 0 <sup>1</sup>    |
| <i>Presbytis potenziani</i>      | Mentawai langur               | 0.1 <sup>1</sup>  |
| <i>Presbytis rubicunda</i>       | Maroon leaf monkey            | 0 <sup>1</sup>    |
| <i>Presbytis thomasi</i>         | Thomas's langur               | 1.3 <sup>1</sup>  |
| <i>Trachypithecus pileatus</i>   | Capped langur                 | 0.4 <sup>1</sup>  |
| <i>Rhinopithecus avunculus</i>   | Tonkin snub-nosed monkey      | 5.6 <sup>1</sup>  |
| <i>Nasalis larvatus</i>          | Proboscis monkey              | 2.8 <sup>1</sup>  |
| <i>Pygathrix nigripes</i>        | Black-shanked douc            | 2.25 <sup>1</sup> |
| <i>Pygathrix nemaeus</i>         | Red-shanked douc              | 1.78 <sup>1</sup> |
| <i>Colobus guereza</i>           | Mantled guereza               | 6.2 <sup>1</sup>  |
| <i>Colobus satanas</i>           | Black colobus                 | 5.5 <sup>1</sup>  |
| <i>Colobus polykomos</i>         | King colobus                  | 0.7 <sup>1</sup>  |
| <i>Colobus angolensis</i>        | Angola colobus                | 5 <sup>1</sup>    |
| <i>Colobus vellerosus</i>        | Ursine colobus                | 1 <sup>1</sup>    |
| <i>Piliocolobus rufomitrat</i>   | Tana River red colobus monkey | 2.1 <sup>1</sup>  |
| <i>Piliocolobus badius</i>       | Western red colobus           | 5.4 <sup>1</sup>  |
| <i>Piliocolobus kirkii</i>       | Zanzibar red colobus          | 7 <sup>1</sup>    |
| <i>Piliocolobus tephrosceles</i> | Ugandan red colobus           | 5.2 <sup>1</sup>  |
| <i>Procolobus verus</i>          | Olive colobus                 | 3.6 <sup>1</sup>  |
| <i>Cercopithecus mitis</i>       | Blue monkey                   | 8 <sup>1</sup>    |
| <i>Cercopithecus ascanius</i>    | Red-tailed monkey             | 5.6 <sup>1</sup>  |
| <i>Cercopithecus campbelli</i>   | Campbell's mona monkey        | 2.8 <sup>1</sup>  |
| <i>Cercopithecus diana</i>       | Diana monkey                  | 2.5 <sup>1</sup>  |

|             |                                      |                             |                   |                            |
|-------------|--------------------------------------|-----------------------------|-------------------|----------------------------|
|             | <i>Chlorocebus djamdjamensis</i>     | Bale monkey                 | 2.7 <sup>1</sup>  | Arboreal Old World Monkeys |
|             | <i>Lophocebus albigena</i>           | Grey-cheeked mangabey       | 5.2 <sup>1</sup>  |                            |
|             | <i>Cercocebus galeritus</i>          | Tana river mangabey         | 5.5 <sup>1</sup>  |                            |
|             | <i>Macaca fascicularis</i>           | Crab-eating macaque         | 10.6 <sup>1</sup> |                            |
|             |                                      |                             |                   | 98.8/27 = 3.7              |
|             | Arboreal Lemurs                      |                             |                   |                            |
|             | <i>Avahi laniger</i>                 | Eastern wooly lemur         | 2 <sup>1</sup>    | Arboreal Lemurs            |
|             | <i>Eulemur fulvus</i>                | Common brown lemur          | 8.3 <sup>1</sup>  |                            |
|             | <i>Propithecus verreauxi</i>         | Verreaux's sifaka           | 2 <sup>1</sup>    |                            |
|             |                                      |                             |                   |                            |
| Terrestrial |                                      |                             |                   |                            |
|             | Chimpanzees†                         |                             |                   |                            |
|             | <i>Pan paniscus</i>                  | Bonobo                      | 5.7 <sup>1</sup>  | Chimpanzees                |
|             | <i>Pan troglodytes</i>               | Common chimpanzee           | 9.8 <sup>1</sup>  |                            |
|             |                                      |                             | 15.5/2 = 7.8      |                            |
|             | Terrestrial Old World Monkeys        |                             |                   |                            |
|             | <i>Trachypithecus leucocephalus</i>  | White-headed langur         | 11.5 <sup>1</sup> |                            |
|             | <i>Trachypithecus francoisi</i>      | François' langur            | 1.2 <sup>1</sup>  |                            |
|             | <i>Semnopithecus achates</i>         | Southern plains gray langur | 6 <sup>1</sup>    |                            |
|             | <i>Semnopithecus entellus</i>        | Gray langur                 | 6 <sup>1</sup>    |                            |
|             | <i>Semnopithecus cf. schistaceus</i> | Nepal gray langur           | 8.4 <sup>1</sup>  |                            |
|             | <i>Rhinopithecus bieti</i>           | Black snub-nosed monkey     | 6.7 <sup>1</sup>  |                            |
|             | <i>Chlorocebus aethiops</i>          | Vervet monkey               | 6.8 <sup>1</sup>  |                            |

|                           |                             |                   |                            |                                      |
|---------------------------|-----------------------------|-------------------|----------------------------|--------------------------------------|
|                           | <i>Erythrocebus patas</i>   | Patas monkey      | 4.53 <sup>1</sup>          | <b>Terrestrial Old World Monkeys</b> |
|                           | <i>Macaca fuscata</i>       | Japanese macaque  | 18 <sup>1</sup>            |                                      |
|                           | <i>Macaca mulatta</i>       | Rhesus macaque    | 6.6 <sup>1</sup>           |                                      |
|                           | <i>Macaca munzala</i>       | Arunachal macaque | 12 <sup>1</sup>            |                                      |
|                           | <i>Theropithecus gelada</i> | Gelada            | 17.4 <sup>1</sup>          |                                      |
|                           | <i>Papio anubis</i>         | Olive baboon      | 7.1 <sup>1</sup>           |                                      |
|                           | <i>Papio papio</i>          | Guinea baboon     | 8.3 <sup>1</sup>           |                                      |
|                           | <i>Papio hamadryas</i>      | Hamadryas baboon  | 13.5 <sup>1</sup>          |                                      |
|                           | <i>Papio ursinus</i>        | Chacma baboon     | 12.8 <sup>1</sup>          |                                      |
|                           |                             |                   | <b>146.8/16 =</b>          | <b>9.2</b>                           |
| <b>Terrestrial Lemurs</b> |                             |                   |                            |                                      |
| <b>Terrestrial Lemurs</b> |                             |                   |                            |                                      |
|                           | <i>Lemur Catta</i>          | Ring-tailed Lemur | <b>7.8<sup>1</sup>/1 =</b> | <b>7.8</b>                           |
| <b>Gorillas†</b>          |                             |                   |                            |                                      |
|                           | <i>Gorilla gorilla</i>      | Western gorilla   | 0.1 <sup>1</sup>           | <b>Gorillas</b>                      |
|                           | <i>Gorilla beringei</i>     | Eastern gorilla   | 2.5 <sup>1</sup>           |                                      |
|                           |                             |                   | <b>2.6/2 =</b>             | <b>1.3</b>                           |
| <b>Humans†‡</b>           |                             |                   |                            |                                      |
| <b>Humans</b>             |                             |                   |                            |                                      |
|                           | <i>Homo sapiens</i>         | Human             | <b>0.8<sup>2</sup>/1 =</b> | <b>0.8</b>                           |

†Hominid. ‡Hominin.

1 Grueter, C.C., et al. (2013, Ref. 220).

2 Jaeggi, A.V., et al. (2017, Ref. 221).
